# Supplementary material for: Hierarchical porous carbon nanofibrous membranes with an enhanced shape memory property for effective adsorption of proteins
Source: Royal Society of Chemistry journal article supplement (doi:10.1039/c5ra11627a), 2015-01-01
Supplement: c5ra11627a1.pdf [file c5ra11627a1.pdf]

**Hierarchical porous carbon nanofibrous membranes with enhanced shape  
memory property for effective adsorption of proteins**

*Gang Fan*<sup>a†</sup>, *Jianlong Ge*<sup>b†</sup>, *Hak-Yong Kim*<sup>c</sup>, *Bin Ding*<sup>a,b,\*</sup>,

*Salem S. Al-Deyab*<sup>d,\*</sup>, *Mohamed El-Newehy*<sup>d,e</sup>, *Jianyong Yu*<sup>b</sup>

<sup>a</sup> State Key Laboratory for Modification of Chemical Fibers and Polymer Materials,  
College of Materials Science and Engineering, Donghua University, Shanghai, 201620,  
China.

<sup>b</sup> Key Laboratory of Textile Science & Technology, Ministry of Education, College of  
Textiles, Donghua University, Shanghai 201620, China.

<sup>c</sup> Department of BIN Fusion Technology, Chonbuk National University, Jeonju 561-  
756, Republic of Korea.

<sup>d</sup> Petrochemical Research Chair, Department of Chemistry, College of Science, King  
Saud University, Riyadh 11451, Saudi Arabia.

<sup>e</sup> Department of Chemistry, Faculty of Science, Tanta University, Tanta 31527, Egypt.

† These authors contributed equally to this work.

## Support information

### Calculation of fractal dimension

The fractal dimension (D) was calculated by following FHH equation:

$$\ln(V/V_{\text{mono}}) = A[\ln(\ln(P_0/P))] + \text{constant}$$

where V is the amount of N<sub>2</sub> adsorbed at each equilibrium pressure, P; V<sub>mono</sub> is the adsorbed amount of monolayer coverage; and P<sub>0</sub> is the saturation pressure. By which a plot of ln(V/V<sub>mono</sub>) versus ln(ln(P<sub>0</sub>/P)) shows a linear trend could be reconstructed, and the slope A could be used to calculate D utilizing the expression: A = D - 3, which was according to the dominant forces of liquid-gas surface tension at high coverage.

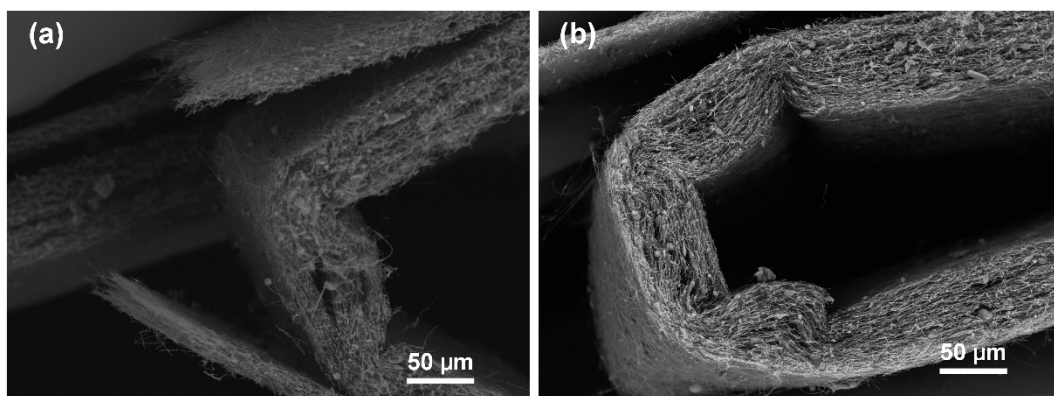

Fig. S1 SEM images of (a) pristine CNF membrane showing the cracking, and (b) SiO<sub>2</sub>@CNF-20 membrane with intact structure under deformation.

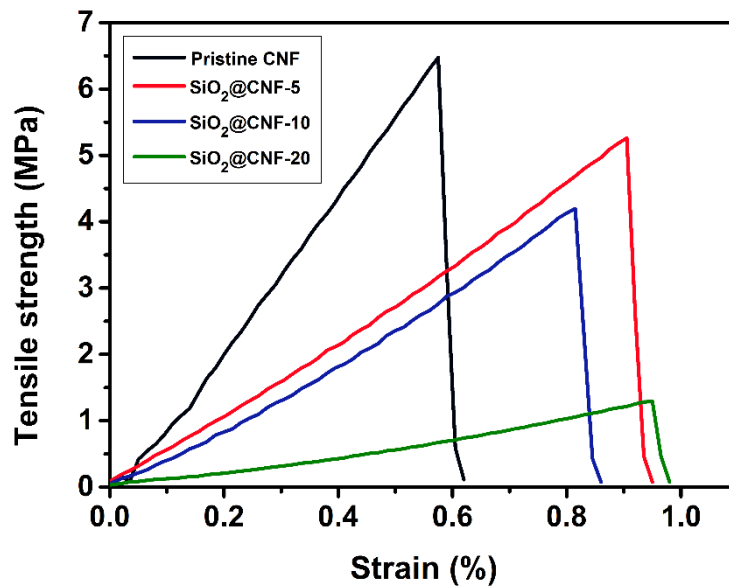

Fig. S2 Tensile curves of CNF membranes derived from precursor fibers with different SiO<sub>2</sub> nanoparticles contents.

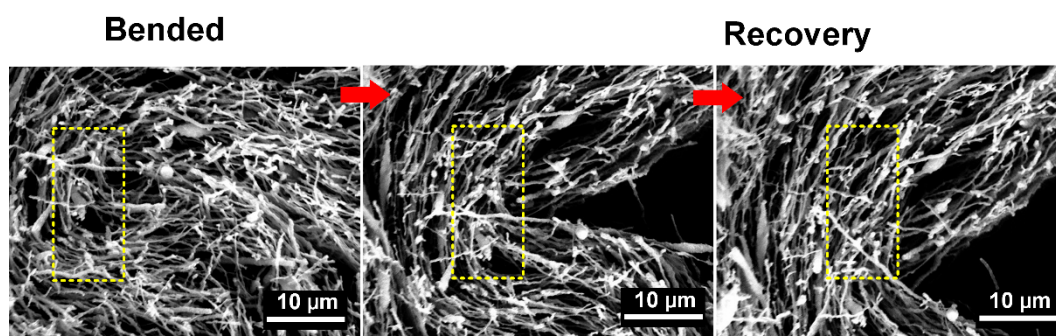

Fig. S3 In-situ SEM images of SiO<sub>2</sub>@CNF-20 membrane showing the robust mechanical stability of single fiber under different deformations.

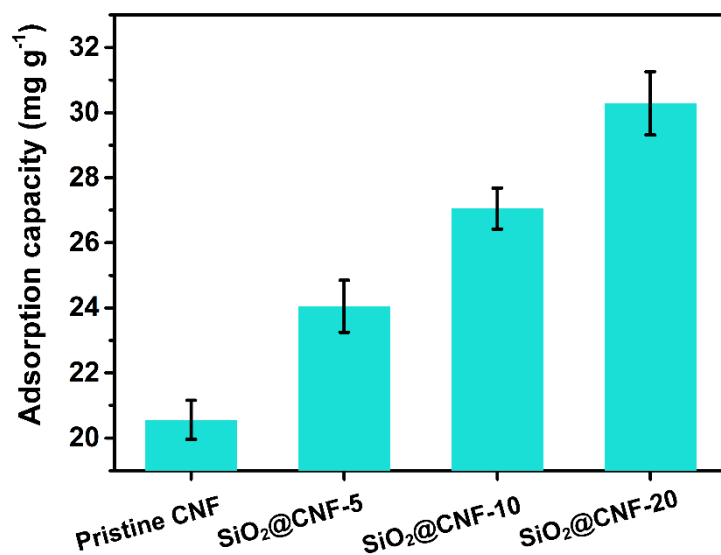

Fig. S4 BSA adsorption capacity of CNFs membranes derived from precursor fibers with different SiO<sub>2</sub> nanoparticles contents.
